# Supplementary material for: Using a robust decision making (RDM) approach to explore current and future vulnerabilities of a semi-arid coastal basin: a case study of the Quilimarí basin in Chile
Source: Frontiers journal article supplement (doi:10.3389/fenvs.2025.1553675), 2025-07-30
Supplement: Table_1.xlsx [file Table_1.xlsx]

## Sheet: Hoja1
	Model Code	Full Name
	ACCESS-CM2	Australian Community Climate and Earth System Simulator Coupled Model 2
	AWI-CM-1-1-MR	Alfred Wegener Institute Climate Model Version 1.1, Medium Resolution
	EC-Earth3-Veg	EC-Earth version 3 with dynamic vegetation component
	MPI-ESM1-2-LR	Max Planck Institute Earth System Model version 1.2, Low Resolution
	NESM3	Nanjing University of Information Science and Technology Earth System Model 3
	SSP Code	Shared Socioeconomic Pathway (SSP)
	SSP2-4.5	"Middle of the Road"
	SSP5-8.5	"Fossil-fueled Development"
